# Supplementary material
Source: Springer Nature journal article supplement (https://www.springermedizin.de/resource/supplementary/13276_2014_28_MOESM2_ESM.pdf/9676614)

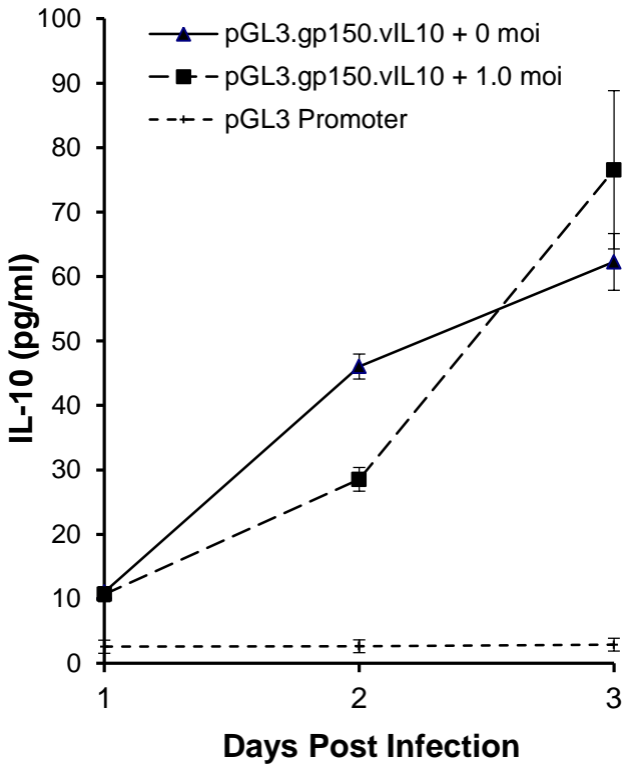

Supplement: MOESM2 [file 9676614]
